# Supplementary material for: Intranasal Delivery of Anti-Apoptotic siRNA Complexed with Fas-Signaling Blocking Peptides Attenuates Cellular Apoptosis in Brain Ischemia
Source: MDPI journal article supplement (doi:10.3390/pharmaceutics16020290), 2024-02-18
Supplement: s1 [file s1]

## **Supplementary Materials**

### **Intranasal delivery of anti-apoptotic siRNA complexed with Fas-signaling blocking peptides attenuates cellular apoptosis in brain ischemia**

**Kunho Chung<sup>1,2,†</sup>, Irfan Ullah<sup>1,3,†</sup>, Yujong Yi<sup>1</sup>, Eunhwa Kang<sup>1</sup>, Gyeongju Yun<sup>1</sup>, Seoyoun Heo<sup>1</sup>, Minkyung Kim<sup>1</sup>,  
Seong-Eun Chung<sup>1</sup>, Seongjun Park<sup>1</sup>, Jaeyeoung Lim<sup>1</sup>, Minhyung Lee<sup>1</sup>, Taiyoun Rhim<sup>1,\*</sup> and Sang-Kyung Lee<sup>1,\*</sup>**

#### **Total Supplementary Figures (S1~S5)**

Figure S1. Cytotoxicity measured by the CCK-8 viability assay of Jurkat cells

Figure S2. Cytotoxicity measured by the CCK-8 viability assay of Neuro-2a cells

Figure S3. Fas induction in Neuro-2a cells under hypoxic conditions

Figure S4. Ineffectiveness of FBP9R in delivering siRNA into normoxia Neuro-2a cells

Figure S5. Peptide toxicity test by CCK-8 assay in ARPE-19 cells

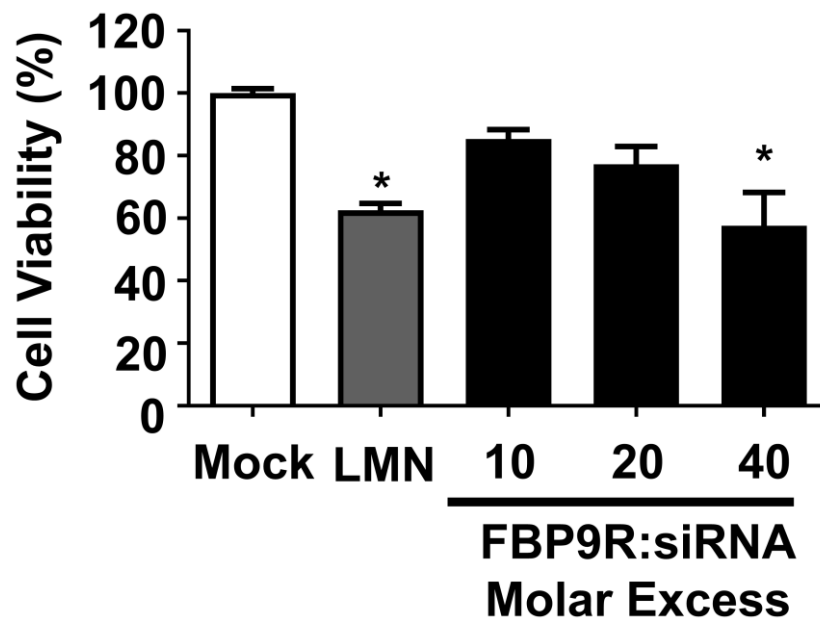

**Figure S1.** Cytotoxicity measured by the CCK-8 viability assay of Jurkat cells. Cytotoxicity assessed 24 hr post-transfection of Jurkat cells with FBP9RC/siRNA nanocomplexes. FBP9RC peptides were complexed with 100 pmole of siRNA at the indicated peptide:siRNA molar excess. Relative percent cell viability was normalized with the mock group. \* $p < 0.05$  verse 10 group.

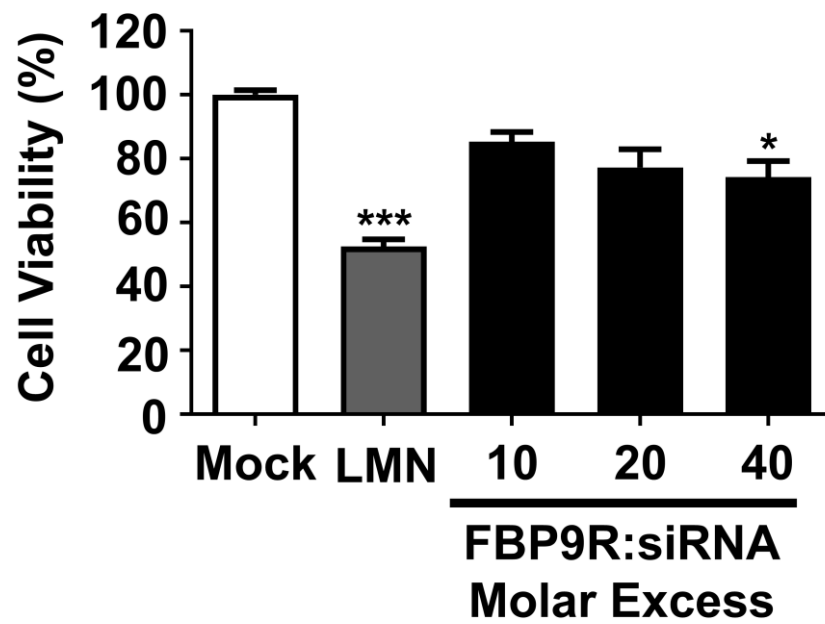

**Figure S2.** Cytotoxicity measured by the CCK-8 viability assay of Neuro-2a cells. Cytotoxicity assessed 24 hr post transfection of Neuro-2a cells with FBP9RC/siRNA nanocomplexes. FBP9RC peptides were complexed with 100 pmole of siRNA at the indicated peptide:siRNA molar excess. Relative percent cell viability was normalized with mock group. \* $p < 0.05$ , \*\*\* $p < 0.001$  verse 10 group.

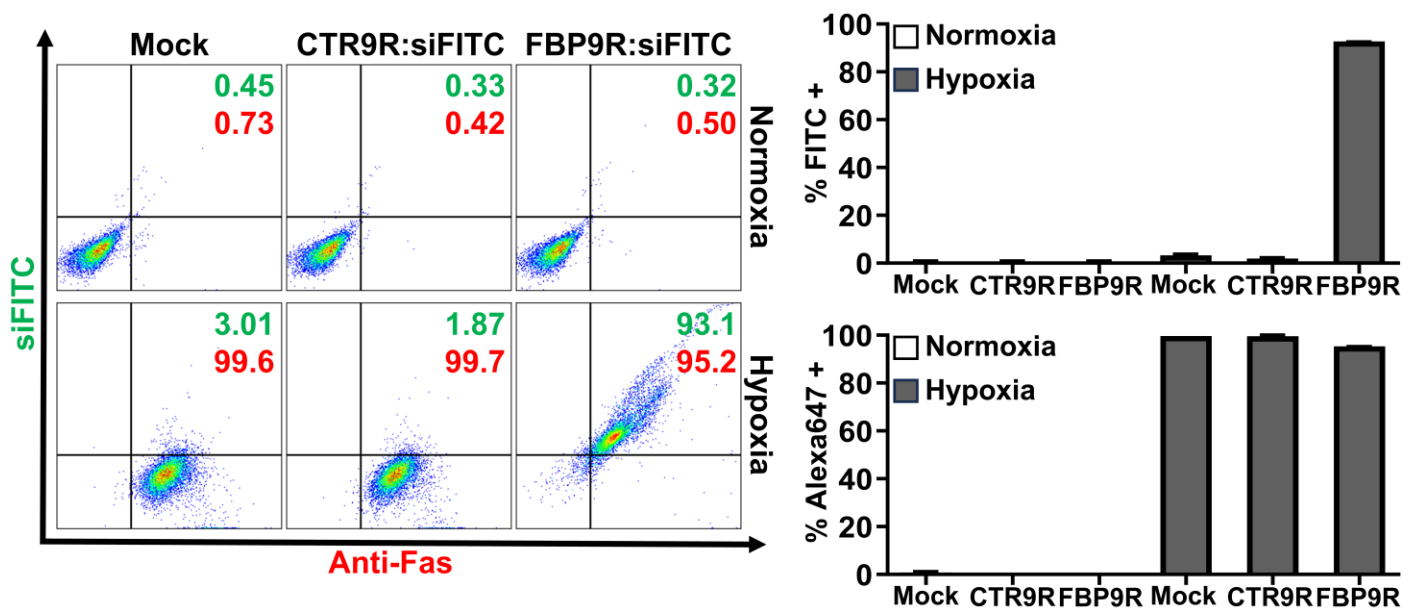

**Figure S3. Fas induction in Neuro-2a cells under hypoxic conditions.** Flow cytometry analysis for Fas and FBP9R binding in hypoxia Neuro-2a cells. Hypoxia induced Fas and FBP9R binding exclusively to hypoxic cells. In hypoxia, scrambled peptide (CTR9R) did not bind to Fas, although cells expressed Fas. Representative dot-plot (left panel) and cumulative data for percent of Fas-positive cells (right panel). \* $p < 0.05$ , \*\* $p < 0.01$  versus mock group. All data were obtained from three independent experiments and shown as mean  $\pm$  SD.

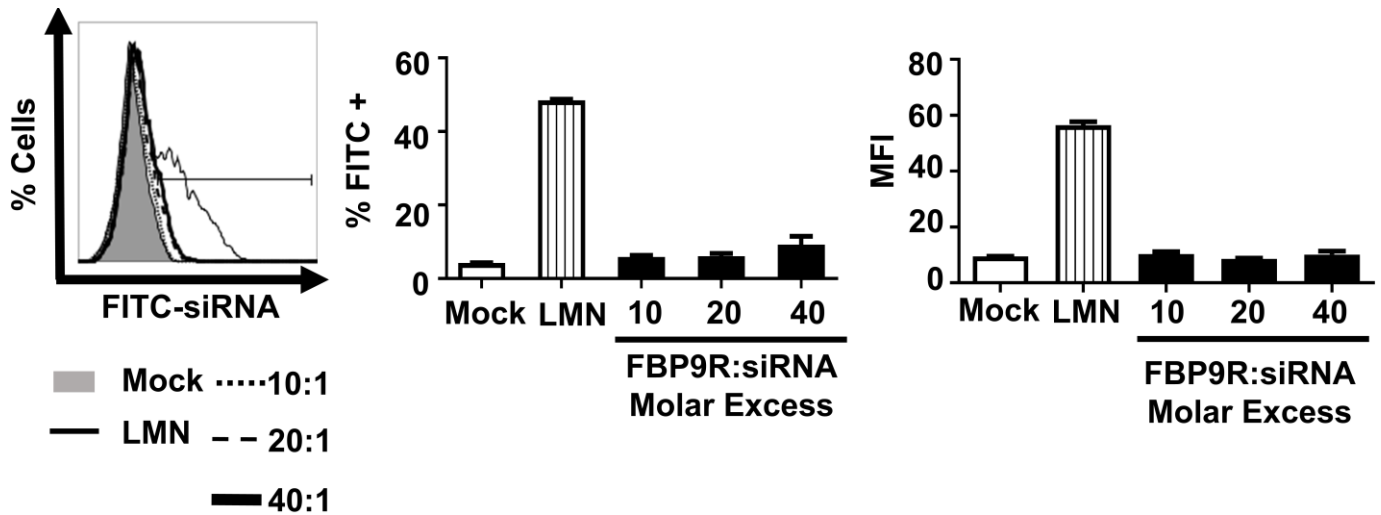

**Figure S4. Ineffectiveness of FBP9R in delivering siRNA into normoxia Neuro-2a cells.** Flow cytometry analysis for the efficacy of siRNA delivery by FBP9R/siRNA nanocomplexes in hypoxia Neuro-2a cells. FBP9R peptides were complexed with 200 pmole of FITC-labeled siRNA at the indicated peptide:siRNA molar excess. Representative histogram (left panel) and cumulative data for percent of FITC-positive cells (middle panel), mean fluorescence intensity (right panel). \* $p < 0.05$ , \*\* $p < 0.01$  versus mock group. All data were obtained from three independent experiments and shown as mean  $\pm$  SD.

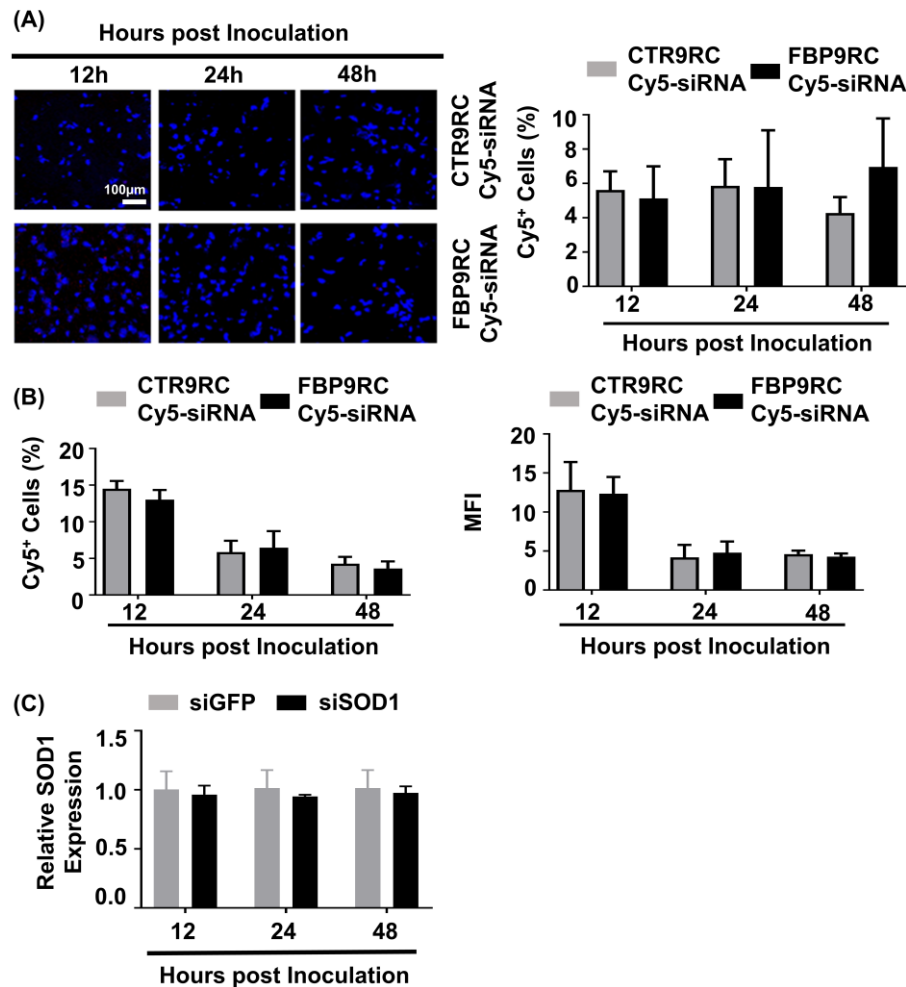

**Figure S5. Lack of localization of intranasally delivered FBP9R/siRNA nanocomplexes to normoxia brain regions in the rat model of brain ischemia.** (A) Immunohistochemistry of intranasally delivered Cy5-labeled siRNA in the normal hemisphere at indicated hours post-injection. Representative images (left panel) and cumulative data from six independent animals per groups (right panel) indicating percent of Cy5-positive cells. Scale bar indicates 50  $\mu$ m. (B) Flow cytometry analysis of Cy5-positive cells in the infarcted hemisphere. Cumulative data for percent of Cy5-positive cells (left panel) or mean fluorescence intensity (right panel) obtained from six independent animals per groups. (C) Gene silencing efficiency of intranasally delivered FBP9R/siRNA nanocomplexes in the normal hemisphere from six independent animals.
